# Supplementary material for: Shotgun Metagenomic Sequencing to Assess Cyanobacterial Community Composition following Coagulation of Cyanobacterial Blooms
Source: MDPI journal article supplement (doi:10.3390/toxins14100688), 2022-10-07
Supplement: s1 [file toxins-1939413-supplementary.pdf › toxins-1939413-supplementary.pdf]

# Supplementary Material

## Shotgun Metagenomic Sequencing to Assess Cyanobacterial Community Composition following Coagulation of Cyanobacterial Blooms

Kim Thien Nguyen Le <sup>1,\*</sup>, Juan Francisco Guerra Maldonado <sup>1</sup>, Eyerusalem Goitom <sup>2</sup>, Hana Trigui <sup>3</sup>, Yves Terrat <sup>4</sup>, Thanh-Luan Nguyen <sup>1</sup>, Barry Husk <sup>5</sup>, B. Jesse Shapiro <sup>4,6,7</sup>, Sébastien Sauvé <sup>8</sup>, Michèle Prévost <sup>1</sup> and Sarah Dorner <sup>1</sup>

<sup>1</sup> Department of Civil, Geological and Mining Engineering, Polytechnique de Montréal, Montréal, QC H3C 3A7, Canada

<sup>2</sup> Department of Geography and Environmental Studies, Toronto Metropolitan University, Toronto, ON M5B 2K3, Canada

<sup>3</sup> Institut National de Santé Publique de Québec, Montréal, QC H2P 1E2, Canada

<sup>4</sup> Department of Biological Sciences, University of Montréal, Montréal, QC H2V 0B3, Canada

<sup>5</sup> BlueLeaf Inc., 310 Chapleau Street, Drummondville, QC J2B 5E9, Canada

<sup>6</sup> McGill Genome Centre, McGill University, Montréal, QC H3A 0G1, Canada

<sup>7</sup> Department of Microbiology and Immunology, McGill University, Montréal, QC H3A 2B4, Canada

<sup>8</sup> Department of Chemistry, University of Montréal, Montréal, QC H3C 3J7, Canada

\* Correspondence: thien-kim.le-nguyen@polymtl.ca

**Table S1.** Removal effectiveness (%) of taxonomic cell counts of individual cyanobacterial genus after 48 hours (Mean±Standard deviation) in Missisquoi Bay (MB) and Petit Lac St. François (PLSF). Adapted from the author of [1].

| Event                          | Treat     | Total cell counts | <i>Aphanizomenon</i> | <i>Aphanocapsa</i> | <i>Aphanothece</i> | <i>Chroococcus</i> | <i>Coelosphaerium</i> | <i>Dolichospermum</i> | <i>Merismopedia</i> | <i>Microcystis</i> | <i>Pseudanabaena</i> |
|--------------------------------|-----------|-------------------|----------------------|--------------------|--------------------|--------------------|-----------------------|-----------------------|---------------------|--------------------|----------------------|
| MB<br>September<br>10-12, 2018 | 20 mgFe/L | 99.96±0.04        | 97.84±3.05           | 100.0±0.00         | 98.30±0.21         | 100.0±0.00         | NA                    | 99.88±0.04            | 100.0±0.00          | 99.97±0.01         | 99.97±2.81           |
|                                | 35 mgFe/L | 99.94±0.04        | 97.69±1.12           | 100.0±0.00         | 97.27±0.11         | 100.0±0.00         | NA                    | 99.81±0.05            | 100.0±0.00          | 99.65±0.05         | 97.75±0.79           |
| MB<br>September<br>24-26, 2018 | 20 mgFe/L | 71.91±5.38        | 68.55±1.94           | 89.27±6.55         | 64.38±2.83         | NA                 | NA                    | 75.22±7.48            | 100.0±0.00          | 86.92±2.14         | 72.69±3.93           |
|                                | 35 mgFe/L | 96.39±1.29        | 80.58±7.53           | 76.56±2.31         | 69.09±1.63         | NA                 | NA                    | 98.51±1.19            | 100.0±0.00          | 93.98±2.61         | 71.59±8.54           |
| MB<br>August 13-<br>15, 2019   | 20 mgFe/L | 94.27±1.67        | 93.91±1.64           | NA                 | 87.73±6.22         | NA                 | 100.0±0.00            | 97.17±3.14            | NA                  | 86.55±1.62         | NA                   |
|                                | 35 mgFe/L | 99.35±0.11        | 99.26±0.15           | NA                 | 96.51±1.44         | NA                 | 100.0±0.00            | 99.97±0.01            | NA                  | 100.0±0.00         | NA                   |
| PLSF<br>June<br>26-28, 2019    | 20 mgFe/L | 85.22±6.43        | 77.17±8.16           | NA                 | -37.5±1.67         | NA                 | 35.11±5.01            | 84.66±4.07            | NA                  | 92.66±8.64         | NA                   |
|                                | 35 mgFe/L | 98.99±1.06        | 98.66±1.44           | NA                 | 88.50±4.58         | NA                 | 100.0±0.00            | 99.03±0.95            | NA                  | 95.82±4.36         | NA                   |
| PLSF<br>July<br>24-26, 2019    | 20 mgFe/L | 51.98±6.21        | 76.76±4.51           | NA                 | -13.5±1.24         | 100.0±0.00         | 19.36±1.14            | 66.57±4.71            | 77.5±0.28           | 66.99±0.95         | NA                   |
|                                | 35 mgFe/L | 99.11±0.11        | 97.93±0.28           | NA                 | 92.65±0.96         | 100.0±0.00         | 100.0±0.00            | 100.0±0.00            | 100.0±0.00          | 100.0±0.00         | NA                   |
| PLSF<br>August 05-<br>07, 2019 | 20 mgFe/L | 78.21±6.72        | 72.22±6.32           | NA                 | 79.47±4.98         | 100.0±0.00         | 75.86±4.33            | 77.97±5.04            | 92.14±3.59          | 96.51±5.39         | NA                   |
|                                | 35 mgFe/L | 99.72±0.65        | 98.22±0.65           | NA                 | 93.46±2.34         | NA                 | 100.0±0.00            | 100.0±0.00            | 100.0±0.00          | 99.97±0.01         | NA                   |

Removal effectiveness percentage (%) =  $\frac{T_0 - T_{48}}{T_0} \times 100$ . NA: no value.



**Table S5.** Environmental conditions of lake water samples in control mesocosms at T48 (Mean  $\pm$  standard deviation). Adapted from author of [1].

| Parameters                  | Missisquoi Bay                  |                                 |                              | Petit-Lac-St-François      |                            |                              |
|-----------------------------|---------------------------------|---------------------------------|------------------------------|----------------------------|----------------------------|------------------------------|
|                             | Event A<br>September 12<br>2018 | Event B<br>September 26<br>2018 | Event C<br>August 15<br>2019 | Event a<br>June 28<br>2019 | Event b<br>July 26<br>2019 | Event c<br>August 07<br>2019 |
| Chlorophyll- <i>a</i> (RFU) | -                               | -                               | 64.72 $\pm$ 0.59             | 3.37 $\pm$ 0.32            | 5.63 $\pm$ 0.16            | 7.88 $\pm$ 0.17              |
| Phycocyanin (RFU)           | -                               | -                               | 169.21 $\pm$ 0.34            | 16.42 $\pm$ 0.15           | 0.87 $\pm$ 0.03            | 6.78 $\pm$ 0.16              |
| pH                          | 7.47 $\pm$ 0.07                 | -                               | 6.33 $\pm$ 0.09              | 9.93 $\pm$ 0.06            | 8.36 $\pm$ 0.07            | 7.37 $\pm$ 0.15              |
| TDS (mg/L)                  | 105 $\pm$ 0.00                  | -                               | 140.0 $\pm$ 4.24             | 151.0 $\pm$ 5.65           | 118.5 $\pm$ 0.71           | 121.0 $\pm$ 0.00             |
| Temp (°C)                   | 22.7 $\pm$ 0.17                 | -                               | 22.09 $\pm$ 0.17             | 27.81 $\pm$ 0.41           | 25.37 $\pm$ 0.34           | 25.25 $\pm$ 0.02             |
| TOC (mg C/L)                | 19.97 $\pm$ 0.24                | 5.46 $\pm$ 0.00                 | 700.0 $\pm$ 23.19            | 11.39 $\pm$ 0.23           | 10.57 $\pm$ 0.21           | 10.19 $\pm$ 0.44             |
| DOC (mg C/L)                | 12.17 $\pm$ 0.39                | 5.08 $\pm$ 0.05                 | 73.48 $\pm$ 1.45             | 9.83 $\pm$ 0.06            | 10.07 $\pm$ 0.83           | 9.81 $\pm$ 0.07              |
| TN (mg N/L)                 | 5.46 $\pm$ 0.69                 | 1.68 $\pm$ 0.01                 | 6.84 $\pm$ 1.78              | 11.21 $\pm$ 1.07           | 1.01 $\pm$ 0.15            | 1.28 $\pm$ 0.05              |
| TP ( $\mu$ g P/L)           | 320.92 $\pm$ 4.48               | 177.49 $\pm$ 21.03              | 2074.60 $\pm$ 20.22          | 603.01 $\pm$ 3.17          | 72.08 $\pm$ 5.32           | 89.29 $\pm$ 4.81             |
| DN (mg N/L)                 | 2.02 $\pm$ 0.001                | 0.48 $\pm$ 0.009                | 1.56 $\pm$ 0.11              | 0.91 $\pm$ 0.25            | 0.58 $\pm$ 0.00            | 0.63 $\pm$ 0.03              |
| DP ( $\mu$ g P/L)           | 40.47 $\pm$ 1.17                | 15.43 $\pm$ 0.25                | 215.01 $\pm$ 11.61           | 108.06 $\pm$ 2.22          | 16.46 $\pm$ 1.16           | 21.81 $\pm$ 2.13             |

- : No data.

**Table S6.** Environmental conditions of lake water samples in mesocosms with dose of 20 mgFe/L at T48 (Mean  $\pm$  standard deviation).

| Parameters                  | Missisquoi Bay                  |                                 |                              | Petit-Lac-St-François      |                            |                              |
|-----------------------------|---------------------------------|---------------------------------|------------------------------|----------------------------|----------------------------|------------------------------|
|                             | Event A<br>September 12<br>2018 | Event B<br>September 26<br>2018 | Event C<br>August 15<br>2019 | Event a<br>June 28<br>2019 | Event b<br>July 26<br>2019 | Event c<br>August 07<br>2019 |
| Chlorophyll- <i>a</i> (RFU) | -                               | -                               | 1.04 $\pm$ 0.002             | 0.08 $\pm$ 0.00            | 1.18 $\pm$ 0.01            | 0.82 $\pm$ 0.07              |
| Phycocyanin (RFU)           | -                               | -                               | 33.69 $\pm$ 5.21             | 0.49 $\pm$ 0.05            | 0.54 $\pm$ 0.00            | 1.03 $\pm$ 0.05              |
| pH                          | 4.9 $\pm$ 0.04                  | -                               | 5.08 $\pm$ 1.01              | 6.09 $\pm$ 0.01            | 7.70 $\pm$ 0.19            | 5.66 $\pm$ 0.02              |
| TDS (mg/L)                  | 138 $\pm$ 0.00                  | -                               | 152.00 $\pm$ 0.00            | 130.00 $\pm$ 0.00          | 139.00 $\pm$ 0.00          | 146.00 $\pm$ 0.00            |
| Temp (°C)                   | 21.8 $\pm$ 0.01                 | -                               | 22.95 $\pm$ 0.04             | 23.92 $\pm$ 0.02           | 25.21 $\pm$ 0.01           | 25.03 $\pm$ 0.01             |
| TOC (mg C/L)                | 4.52 $\pm$ 0.15                 | 2.22 $\pm$ 0.09                 | 23.76 $\pm$ 4.52             | 17.56 $\pm$ 2.71           | 3.81 $\pm$ 0.51            | 3.69 $\pm$ 0.11              |
| DOC (mg C/L)                | 3.21 $\pm$ 0.03                 | 2.39 $\pm$ 0.03                 | 22.62 $\pm$ 1.92             | 15.10 $\pm$ 2.87           | 3.63 $\pm$ 0.24            | 3.44 $\pm$ 0.01              |
| TN (mg N/L)                 | 0.67 $\pm$ 0.01                 | 1.29 $\pm$ 0.01                 | 4.16 $\pm$ 1.01              | 3.71 $\pm$ 0.48            | 0.55 $\pm$ 0.007           | 0.35 $\pm$ 0.009             |
| TP ( $\mu$ g P/L)           | 8.47 $\pm$ 0.35                 | 126.02 $\pm$ 14.54              | 167.73 $\pm$ 6.34            | 130.02 $\pm$ 14.49         | 20.12 $\pm$ 1.15           | 14.73 $\pm$ 0.71             |
| DN (mg N/L)                 | 0.64 $\pm$ 0.001                | 0.39 $\pm$ 0.01                 | 3.28 $\pm$ 0.29              | 1.28 $\pm$ 0.04            | 0.36 $\pm$ 0.02            | 0.23 $\pm$ 0.001             |
| DP ( $\mu$ g P/L)           | 5.51 $\pm$ 0.02                 | 7.14 $\pm$ 0.14                 | 60.08 $\pm$ 12.79            | 19.34 $\pm$ 1.44           | 6.72 $\pm$ 1.56            | 3.56 $\pm$ 0.21              |

**Table S7.** Environmental conditions of lake water samples in mesocosms with dose of 35 mgFe/L at T48 (Mean  $\pm$  standard deviation).

| Parameters                  | Missisquoi Bay                  |                                 |                              | Petit-Lac-St-François      |                            |                              |
|-----------------------------|---------------------------------|---------------------------------|------------------------------|----------------------------|----------------------------|------------------------------|
|                             | Event A<br>September 12<br>2018 | Event B<br>September 26<br>2018 | Event C<br>August 15<br>2019 | Event a<br>June 28<br>2019 | Event b<br>July 26<br>2019 | Event c<br>August 07<br>2019 |
| Chlorophyll- <i>a</i> (RFU) | -                               | -                               | 1.05 $\pm$ 0.002             | 0.01 $\pm$ 0.00            | 0.09 $\pm$ 0.007           | 0.01 $\pm$ 0.00              |
| Phycocyanin (RFU)           | -                               | -                               | 29.69 $\pm$ 1.13             | 0.05 $\pm$ 0.00            | 0.11 $\pm$ 0.00            | 0.015 $\pm$ 0.007            |
| pH                          | 3.95 $\pm$ 0.08                 | -                               | 4.01 $\pm$ 0.13              | 4.47 $\pm$ 0.15            | 4.1 $\pm$ 0.02             | 4.01 $\pm$ 0.05              |
| TDS (mg/L)                  | 198 $\pm$ 0.00                  | -                               | 221.5 $\pm$ 9.81             | 285.01 $\pm$ 7.12          | 228.00 $\pm$ 0.00          | 296.50 $\pm$ 2.12            |
| Temp (°C)                   | 21.05 $\pm$ 0.01                | -                               | 22.83 $\pm$ 0.12             | 27.73 $\pm$ 0.33           | 25.26 $\pm$ 0.03           | 24.69 $\pm$ 0.33             |
| TOC (mg C/L)                | 4.01 $\pm$ 0.06                 | 2.18 $\pm$ 0.09                 | 22.02 $\pm$ 0.41             | 5.68 $\pm$ 0.34            | 2.27 $\pm$ 0.31            | 1.68 $\pm$ 0.01              |
| DOC (mg C/L)                | 3.71 $\pm$ 0.01                 | 2.41 $\pm$ 0.03                 | 21.07 $\pm$ 0.91             | 7.31 $\pm$ 0.10            | 1.87 $\pm$ 0.21            | 1.87 $\pm$ 0.10              |
| TN (mg N/L)                 | 0.67 $\pm$ 0.01                 | 1.07 $\pm$ 0.02                 | 4.06 $\pm$ 0.15              | 0.95 $\pm$ 0.01            | 0.28 $\pm$ 0.007           | 0.29 $\pm$ 0.007             |
| TP ( $\mu$ g P/L)           | 8.83 $\pm$ 0.56                 | 109.97 $\pm$ 23.21              | 146.44 $\pm$ 7.81            | 29.29 $\pm$ 0.73           | 6.58 $\pm$ 1.71            | 4.86 $\pm$ 0.82              |
| DN (mg N/L)                 | 0.63 $\pm$ 0.001                | 0.41 $\pm$ 0.007                | 2.93 $\pm$ 0.08              | 0.72 $\pm$ 0.04            | 0.25 $\pm$ 0.001           | 0.27 $\pm$ 0.00              |
| DP ( $\mu$ g P/L)           | 7.11 $\pm$ 0.04                 | 6.92 $\pm$ 0.04                 | 64.71 $\pm$ 4.23             | 17.99 $\pm$ 2.02           | 4.49 $\pm$ 0.11            | 4.01 $\pm$ 0.19              |

**Table S8.** Pairwise Kruskal-Wallis test, showing differences in changing of the species richness and Shannon indices at genus level between control mesocosms and mesocosms with dose of 20 mgFe/L, control mesocosms and mesocosms with dose of 35 mgFe/L, mesocosms with dose of 20 mgFe/L and 35 mgFe/L after 48 hours in Missisquoi Bay and Petit Lac St. François (p-value< 0.05).

|                        |                 | <i>df</i> | <i>chi-squared</i> | <i>p-value</i> |
|------------------------|-----------------|-----------|--------------------|----------------|
| Missisquoi Bay         | <i>Richness</i> | 1         | 1.218              | 0.264          |
|                        | <i>Shannon</i>  | 1         | 0.561              | 0.452          |
| Petit Lac St. François | <i>Richness</i> | 1         | 1.334              | 0.248          |
|                        | <i>Shannon</i>  | 1         | 0.044              | 0.833          |

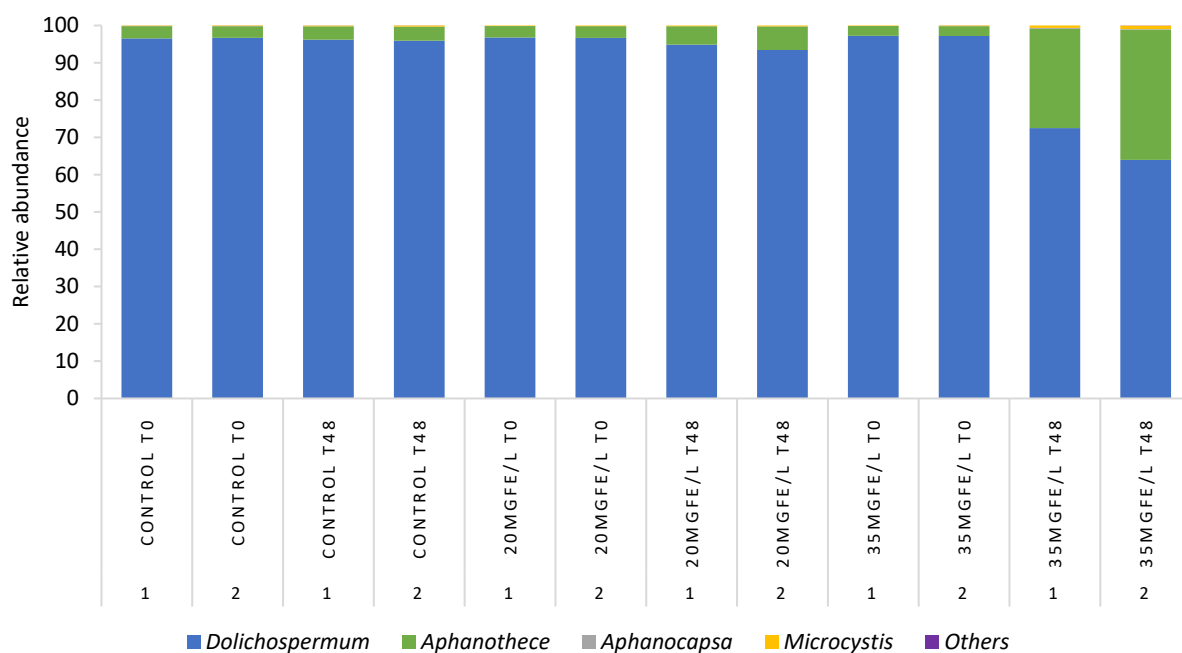

**Figure S1.** Cyanobacterial relative abundance at genus level in the control, 20 mgFe/L and 35 mgFe/L mesocosms in Missisquoi Bay in August 08 (T0) and August 10 (T48), 2018.



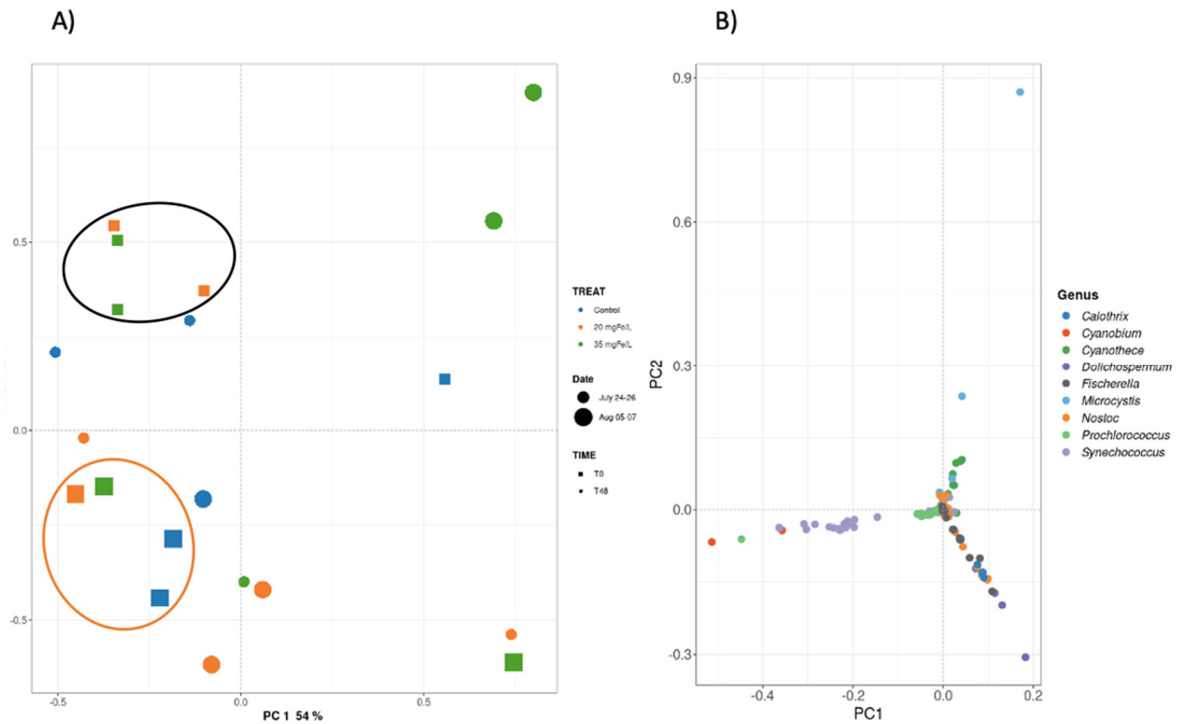

**Figure S3.** Principal components analysis (PCA) of the normalized relative abundance of cyanobacteria community composition in control, 20 mgFe/L and 35 mgFe/L mesocosms with respect to genus abundance in Petit Lac St. François. (a) PCA analysis of cyanobacterial community following coagulation; (b) Data are plotted following the genus-level classification.

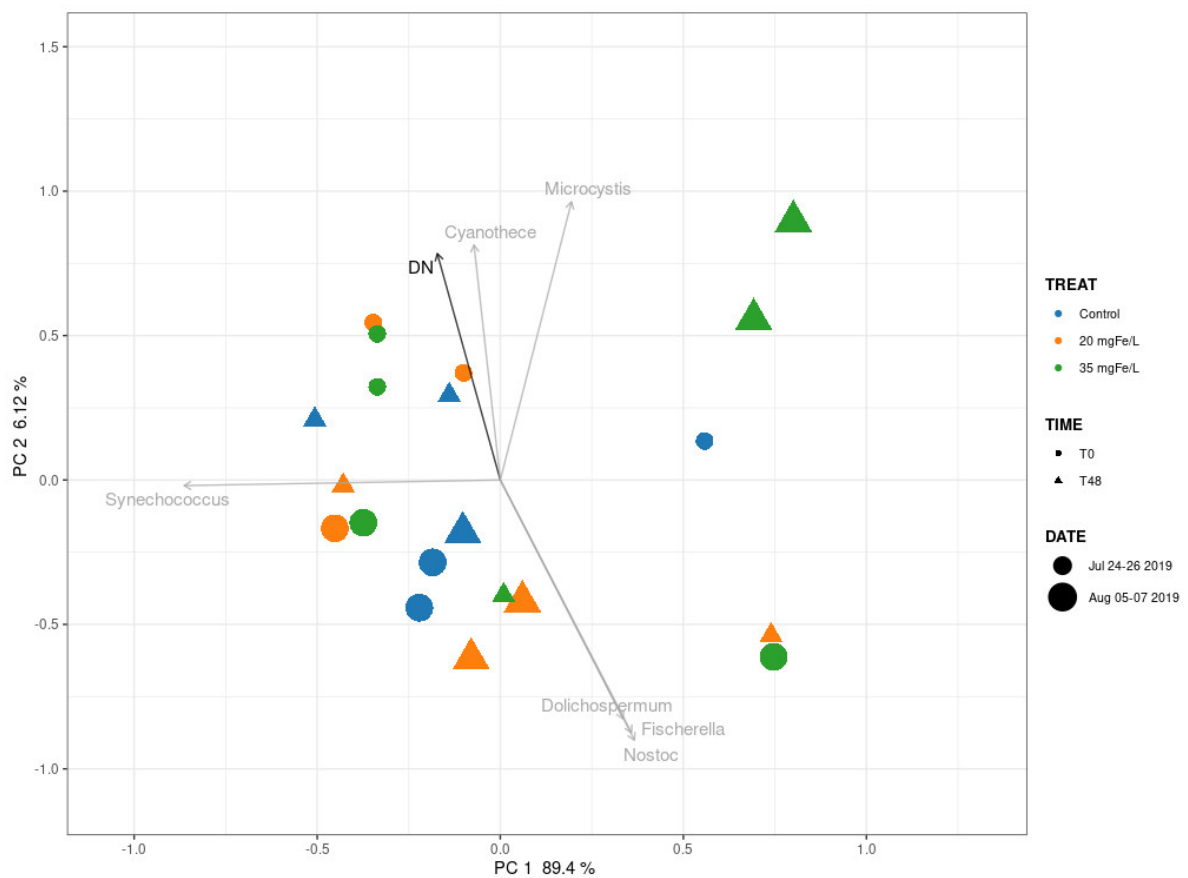

**Figure S4.** Principal components analysis (PCA) of the normalized relative abundance of cyanobacteria community composition in control, 20 mgFe/L and 35 mgFe/L mesocosms with respect to genus abundance in Petit Lac St. François (PLSF). (a) PCA analysis of cyanobacterial community following coagulation; (b) Data are plotted following the genus-level classification.

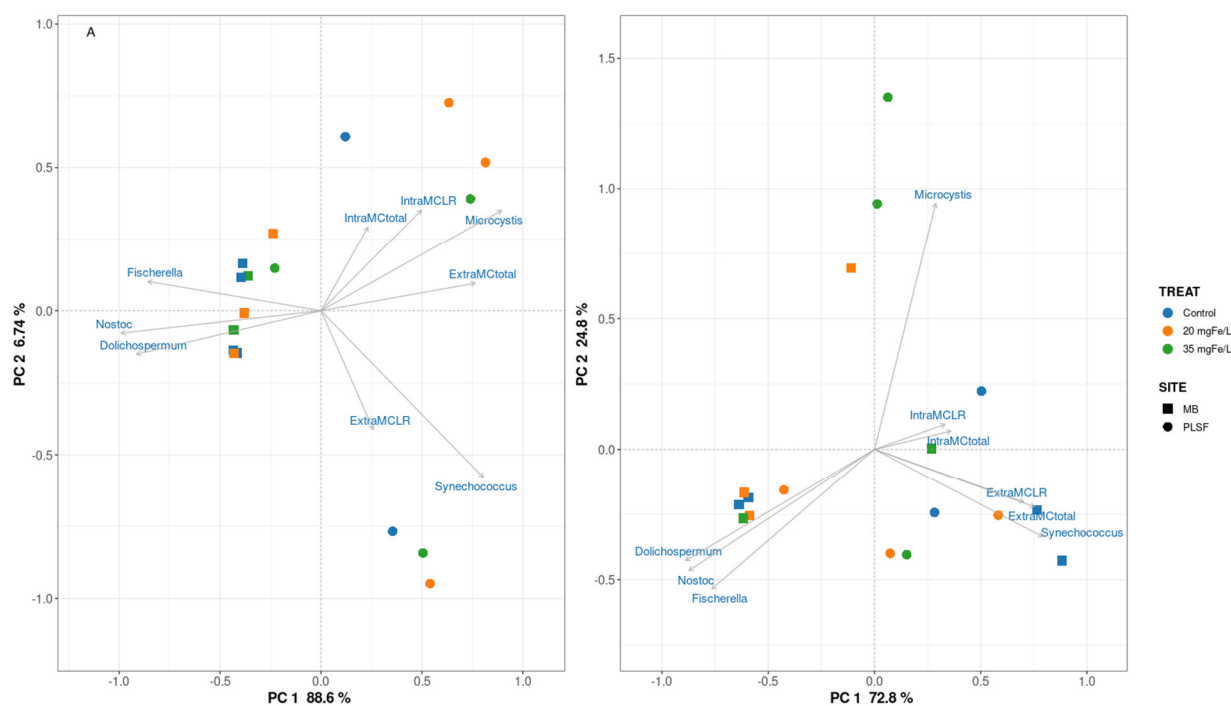

**Figure S5.** Principal components analysis (PCA) of the normalized relative abundance of cyanobacteria community composition in control, 20 mgFe/L and 35 mgFe/L mesocosms with respect to intra- and extracellular total microcystins, MC-LR in Missisquoi Bay and Petit Lac St. François at T0 (left panel) and T48 (right panel).

## References

1. Le, K.T.; Goitom, E.; Trigui, H.; Sauvé, S.; Prévost, M.; Dorner, S. The Effects of Ferric Sulfate ( $\text{Fe}_2(\text{SO}_4)_3$ ) on the Removal of Cyanobacteria and Cyanotoxins: A Mesocosm Experiment. *Toxins* **2021**, *13*, 753. <https://doi.org/10.3390/toxins13110753>.
